# Supplementary material for: Genetically-informed prediction of short-term Parkinson’s disease progression
Source: PubMed Central journal article supplement (PMC9613892; doi:10.1038/s41531-022-00412-w), 2022-10-28
Supplement: 41531_2022_412_MOESM1_ESM.pdf [file 41531_2022_412_MOESM1_ESM.pdf]

**Supplemental Table 1**

**Treated at any point over 36 months**

| Treatment Status (%) | PPMI - UPDRS I |                 |         | PDPB - UPDRS I |                 |         |
|----------------------|----------------|-----------------|---------|----------------|-----------------|---------|
|                      | Progressors    | Non-Progressors | P-value | Progressors    | Non-Progressors | P-value |
| Levodopa             | 0.12 +/- 0.02  | 0.21 +/- 0.03   | 0.07    | 0.76 +/- 0.03  | 0.75 +/- 0.03   | 0.88    |
| Dopamine Agonist     | 0.10 +/- 0.02  | 0.11 +/- 0.02   | 0.85    | 0.56 +/- 0.04  | 0.51 +/- 0.04   | 0.44    |
| Other PD Medications | 0.14 +/- 0.02  | 0.17 +/- 0.03   | 0.5     | 0.77 +/- 0.03  | 0.72 +/- 0.03   | 0.43    |

  

| Treatment Status (%) | PPMI - UPDRS II |                 |         | PDPB - UPDRS II |                 |         |
|----------------------|-----------------|-----------------|---------|-----------------|-----------------|---------|
|                      | Progressors     | Non-Progressors | P-value | Progressors     | Non-Progressors | P-value |
| Levodopa             | 0.13 +/- 0.02   | 0.19 +/- 0.03   | 0.24    | 0.76 +/- 0.03   | 0.75 +/- 0.03   | 0.92    |
| Dopamine Agonist     | 0.11 +/- 0.02   | 0.11 +/- 0.02   | 0.95    | 0.57 +/- 0.04   | 0.49 +/- 0.04   | 0.22    |
| Other PD Medications | 0.13 +/- 0.02   | 0.18 +/- 0.03   | 0.36    | 0.76 +/- 0.03   | 0.72 +/- 0.03   | 0.59    |

  

| Treatment Status (%) | PPMI - UPDRS III |                 |         | PDPB - UPDRS III |                 |         |
|----------------------|------------------|-----------------|---------|------------------|-----------------|---------|
|                      | Progressors      | Non-Progressors | P-value | Progressors      | Non-Progressors | P-value |
| Levodopa             | 0.13 +/- 0.02    | 0.20 +/- 0.03   | 0.19    | 0.75 +/- 0.03    | 0.76 +/- 0.03   | 0.95    |
| Dopamine Agonist     | 0.09 +/- 0.02    | 0.14 +/- 0.02   | 0.29    | 0.54 +/- 0.04    | 0.52 +/- 0.04   | 0.84    |
| Other PD Medications | 0.13 +/- 0.02    | 0.18 +/- 0.03   | 0.38    | 0.75 +/- 0.03    | 0.74 +/- 0.03   | 0.86    |

**Treatment status at month 12**

| Treatment Status (%) | PPMI - UPDRS I |                 |         | PDPB - UPDRS I |                 |         |
|----------------------|----------------|-----------------|---------|----------------|-----------------|---------|
|                      | Progressors    | Non-Progressors | P-value | Progressors    | Non-Progressors | P-value |
| Levodopa             | 0.14 +/-0.01   | 0.22 +/-0.02    | 0.07    | 0.75 +/-0.03   | 0.74 +/-0.03    | 0.86    |
| Dopamine Agonist     | 0.10 +/-0.01   | 0.11 +/-0.01    | 0.89    | 0.55 +/-0.03   | 0.52 +/-0.03    | 0.59    |
| Other PD Medications | 0.14 +/-0.01   | 0.18 +/-0.02    | 0.39    | 0.77 +/-0.03   | 0.71 +/-0.03    | 0.38    |

| Treatment Status (%) | PPMI - UPDRS II |                 |         | PDPB - UPDRS II |                 |         |
|----------------------|-----------------|-----------------|---------|-----------------|-----------------|---------|
|                      | Progressors     | Non-Progressors | P-value | Progressors     | Non-Progressors | P-value |
| Levodopa             | 0.15 +/-0.01    | 0.22 +/-0.02    | 0.14    | 0.75 +/-0.03    | 0.74 +/-0.03    | 0.89    |
| Dopamine Agonist     | 0.10 +/-0.01    | 0.11 +/-0.02    | 0.76    | 0.58 +/-0.03    | 0.50 +/-0.03    | 0.14    |
| Other PD Medications | 0.14 +/-0.01    | 0.19 +/-0.02    | 0.29    | 0.76 +/-0.03    | 0.75 +/-0.01    | 0.51    |

| Treatment Status (%) | PPMI - UPDRS III |                 |         | PDPB - UPDRS III |                 |         |
|----------------------|------------------|-----------------|---------|------------------|-----------------|---------|
|                      | Progressors      | Non-Progressors | P-value | Progressors      | Non-Progressors | P-value |
| Levodopa             | 0.16 +/-0.01     | 0.20 +/-0.02    | 0.37    | 0.75 +/-0.03     | 0.74 +/-0.03    | 0.79    |
| Dopamine Agonist     | 0.08 +/-0.01     | 0.14 +/-0.01    | 0.22    | 0.54 +/-0.03     | 0.53 +/-0.03    | 0.82    |
| Other PD Medications | 0.15 +/-0.01     | 0.18 +/-0.02    | 0.55    | 0.76 +/-0.03     | 0.73 +/-0.03    | 0.67    |

**Treatment status at month 24**

| Treatment Status (%) | PPMI - UPDRS I |                 |         | PDPB - UPDRS I |                 |         |
|----------------------|----------------|-----------------|---------|----------------|-----------------|---------|
|                      | Progressors    | Non-Progressors | P-value | Progressors    | Non-Progressors | P-value |
| Levodopa             | 0.13 +/-0.01   | 0.26 +/-0.02    | 0.007   | 0.74 +/-0.03   | 0.75 +/-0.03    | 0.96    |
| Dopamine Agonist     | 0.09 +/-0.01   | 0.12 +/-0.02    | 0.52    | 0.54 +/-0.03   | 0.53 +/-0.03    | 0.9     |
| Other PD Medications | 0.13 +/-0.01   | 0.21 +/-0.02    | 0.076   | 0.76 +/-0.03   | 0.72 +/-0.03    | 0.5     |

| Treatment Status (%) | PPMI - UPDRS II |                 |         | PDPB - UPDRS II |                 |         |
|----------------------|-----------------|-----------------|---------|-----------------|-----------------|---------|
|                      | Progressors     | Non-Progressors | P-value | Progressors     | Non-Progressors | P-value |
| Levodopa             | 0.17 +/-0.01    | 0.19 +/-0.02    | 0.6     | 0.77 +/-0.02    | 0.71 +/-0.03    | 0.26    |
| Dopamine Agonist     | 0.10 +/-0.01    | 0.11 +/-0.02    | 0.79    | 0.55 +/-0.03    | 0.52 +/-0.03    | 0.7     |
| Other PD Medications | 0.15 +/-0.01    | 0.18 +/-0.02    | 0.58    | 0.76 +/-0.02    | 0.71 +/-0.03    | 0.34    |

| Treatment Status (%) | PPMI - UPDRS III |                 |         | PDPB - UPDRS III |                 |         |
|----------------------|------------------|-----------------|---------|------------------|-----------------|---------|
|                      | Progressors      | Non-Progressors | P-value | Progressors      | Non-Progressors | P-value |
| Levodopa             | 0.19 +/-0.01     | 0.16 +/-0.02    | 0.61    | 0.74 +/-0.03     | 0.75 +/-0.03    | 0.79    |
| Dopamine Agonist     | 0.10 +/-0.01     | 0.11 +/-0.02    | 0.82    | 0.54 +/-0.03     | 0.53 +/-0.03    | 0.75    |
| Other PD Medications | 0.16 +/-0.01     | 0.15 +/-0.02    | 0.81    | 0.76 +/-0.02     | 0.73 +/-0.03    | 0.52    |

**Treatment status at month 36**

| Treatment Status (%) | PPMI - UPDRS I |                 |         | PDPB - UPDRS I |                 |         |
|----------------------|----------------|-----------------|---------|----------------|-----------------|---------|
|                      | Progressors    | Non-Progressors | P-value | Progressors    | Non-Progressors | P-value |
| Levodopa             | 0.14 +/-0.01   | 0.26 +/-0.03    | 0.01    | 0.74 +/-0.02   | 0.75 +/-0.03    | 0.93    |
| Dopamine Agonist     | 0.09 +/-0.01   | 0.13 +/-0.02    | 0.45    | 0.51 +/-0.03   | 0.59 +/-0.04    | 0.17    |
| Other PD Medications | 0.12 +/-0.01   | 0.24 +/-0.03    | 0.015   | 0.76 +/-0.02   | 0.70 +/-0.03    | 0.29    |

| Treatment Status (%) | PPMI - UPDRS II |                 |         | PDPB - UPDRS II |                 |         |
|----------------------|-----------------|-----------------|---------|-----------------|-----------------|---------|
|                      | Progressors     | Non-Progressors | P-value | Progressors     | Non-Progressors | P-value |
| Levodopa             | 0.18 +/-0.01    | 0.18 +/-0.02    | 0.97    | 0.80 +/-0.02    | 0.66 +/-0.03    | 0.2     |
| Dopamine Agonist     | 0.12 +/-0.01    | 0.07 +/-0.01    | 0.27    | 0.52 +/-0.03    | 0.57 +/-0.04    | 0.37    |
| Other PD Medications | 0.16 +/-0.01    | 0.16 +/-0.02    | 0.98    | 0.76 +/-0.02    | 0.70 +/-0.03    | 0.27    |

| Treatment Status (%) | PPMI - UPDRS III |                 |         | PDPB - UPDRS III |                 |         |
|----------------------|------------------|-----------------|---------|------------------|-----------------|---------|
|                      | Progressors      | Non-Progressors | P-value | Progressors      | Non-Progressors | P-value |
| Levodopa             | 0.19 +/-0.02     | 0.16 +/-0.02    | 0.58    | 0.75 +/-0.02     | 0.74 +/-0.03    | 0.91    |
| Dopamine Agonist     | 0.10 +/-0.01     | 0.11 +/-0.02    | 0.96    | 0.54 +/-0.03     | 0.53 +/-0.04    | 0.79    |
| Other PD Medications | 0.17 +/-0.01     | 0.14 +/-0.02    | 0.57    | 0.75 +/-0.02     | 0.71 +/-0.03    | 0.48    |

Supplemental Table 2

| Feature                                              | Average in Progressors +/- Standard Error | Average in None-Progressors +/- Standard Error | P-value |
|------------------------------------------------------|-------------------------------------------|------------------------------------------------|---------|
| pd_diagnosis_months_after_baseline                   | -7.3882 +/- 0.45                          | -7.5894 +/- 0.64                               | 0.017   |
| age_at_baseline                                      | 62.1423 +/- 0.61                          | 61.4516 +/- 0.88                               | 0.033   |
| enrollment_months_after_baseline                     | -0.5732 +/- 0.02                          | -0.5887 +/- 0.03                               | 0.038   |
| moca01_alternating_trail_making                      | 0.8984 +/- 0.02                           | 0.9044 +/- 0.03                                | 0.018   |
| moca02_visuoconstr_skills_cube                       | 0.8089 +/- 0.03                           | 0.7844 +/- 0.04                                | 0.036   |
| moca03_visuoconstr_skills_clock_cont                 | 0.9919 +/- 0.01                           | 0.9764 +/- 0.01                                | 0.025   |
| moca04_visuoconstr_skills_clock_num                  | 0.9512 +/- 0.01                           | 0.9524 +/- 0.02                                | 0.016   |
| moca05_visuoconstr_skills_clock_hands                | 0.8374 +/- 0.02                           | 0.8484 +/- 0.03                                | 0.016   |
| moca_visuospatial_executive_subscore                 | 4.4878 +/- 0.05                           | 4.4644 +/- 0.08                                | 0.018   |
| moca06_naming_lion                                   | 0.9919 +/- 0.01                           | 1.0 +/- 0.0                                    | 0.013   |
| moca07_naming_rhino                                  | 0.9553 +/- 0.01                           | 0.9524 +/- 0.02                                | 0.018   |
| moca08_naming_camel                                  | 1.0 +/- 0.0                               | 0.9764 +/- 0.01                                | 0.03    |
| moca_naming_subscore                                 | 2.9472 +/- 0.01                           | 2.9284 +/- 0.03                                | 0.024   |
| moca09_attention_forward_digit_span                  | 0.9756 +/- 0.01                           | 0.9764 +/- 0.01                                | 0.017   |
| moca10_attention_backward_digit_span                 | 0.9309 +/- 0.02                           | 0.9684 +/- 0.02                                | 0.007   |
| moca_attention_digits_subscore                       | 1.9065 +/- 0.02                           | 1.9444 +/- 0.02                                | 0.007   |
| moca11_attention_vigilance                           | 0.9878 +/- 0.01                           | 0.9844 +/- 0.01                                | 0.018   |
| moca12_attention_serial_7s                           | 2.874 +/- 0.03                            | 2.8484 +/- 0.05                                | 0.012   |
| moca13_sentence_repetition                           | 1.7602 +/- 0.03                           | 1.8644 +/- 0.03                                | 0.002   |
| moca14_verbal_fluency_number_of_words                | 13.3008 +/- 0.3                           | 12.8084 +/- 0.44                               | 0.041   |
| moca15_verbal_fluency                                | 0.7724 +/- 0.03                           | 0.7684 +/- 0.04                                | 0.022   |
| moca_language_subscore                               | 2.5325 +/- 0.04                           | 2.6324 +/- 0.05                                | 0.007   |
| moca16_abstraction                                   | 1.8821 +/- 0.02                           | 1.8564 +/- 0.04                                | 0.018   |
| moca_abstraction_subscore                            | 1.8821 +/- 0.02                           | 1.8564 +/- 0.04                                | 0.018   |
| moca17_delayed_recall_face                           | 0.5755 +/- 0.03                           | 0.5565 +/- 0.04                                | 0.027   |
| moca18_delayed_recall_velvet                         | 0.7592 +/- 0.03                           | 0.8306 +/- 0.03                                | 0.001   |
| moca19_delayed_recall_church                         | 0.7114 +/- 0.03                           | 0.7581 +/- 0.04                                | 0.023   |
| moca20_delayed_recall_daisy                          | 0.6016 +/- 0.03                           | 0.6129 +/- 0.04                                | 0.049   |
| moca21_delayed_recall_red                            | 0.7358 +/- 0.03                           | 0.7364 +/- 0.04                                | 0.028   |
| moca_delayed_recall_subscore                         | 3.378 +/- 0.09                            | 3.4724 +/- 0.11                                | 0.012   |
| moca22_orientation_date_score                        | 0.9837 +/- 0.01                           | 0.9524 +/- 0.02                                | 0.036   |
| moca23_orientation_month_score                       | 1.0 +/- 0.0                               | 1.0 +/- 0.0                                    | 0.016   |
| moca25_orientation_day_score                         | 0.9919 +/- 0.01                           | 0.9924 +/- 0.01                                | 0.017   |
| moca26_orientation_place_score                       | 0.9959 +/- 0.0                            | 1.0 +/- 0.0                                    | 0.014   |
| moca27_orientation_city_score                        | 1.0 +/- 0.0                               | 1.0 +/- 0.0                                    | 0.016   |
| moca_orientation_subscore                            | 5.9715 +/- 0.01                           | 5.9444 +/- 0.02                                | 0.03    |
| moca_total_score                                     | 27.1423 +/- 0.15                          | 27.2484 +/- 0.2                                | 0.013   |
| mod_schwab_england_pct_adl_score                     | 93.9941 +/- 0.42                          | 93.6508 +/- 0.52                               | 0.478   |
| sbr_caudate_r                                        | 2.1111 +/- 0.04                           | 2.0339 +/- 0.06                                | 0.06    |
| sbr_caudate_l                                        | 2.107 +/- 0.04                            | 2.0387 +/- 0.06                                | 0.048   |
| sbr_putamen_r                                        | 0.9704 +/- 0.03                           | 0.9971 +/- 0.05                                | 0.02    |
| sbr_putamen_l                                        | 0.9347 +/- 0.03                           | 0.9613 +/- 0.05                                | 0.018   |
| parkinsons_disease_PRS                               | 0.0046 +/- 0.0                            | 0.0054 +/- 0.0                                 | 0.229   |
| educational_attainment_PRS                           | 0.0005 +/- 0.0                            | 0.0004 +/- 0.0                                 | 0.594   |
| upd2301_speech_problems                              | 1.4366 +/- 0.03                           | 1.5684 +/- 0.04                                | 0.027   |
| upd2302_facial_expression                            | 2.0649 +/- 0.04                           | 2.1632 +/- 0.06                                | 0.178   |
| upd2303a_rigidity_neck                               | 1.5693 +/- 0.04                           | 1.7737 +/- 0.06                                | 0.009   |
| upd2303b_rigidity_rt_upper_extremity                 | 1.9528 +/- 0.05                           | 2.0368 +/- 0.06                                | 0.311   |
| upd2303c_rigidity_left_upper_extremity               | 1.7611 +/- 0.05                           | 1.9789 +/- 0.06                                | 0.006   |
| upd2303d_rigidity_rt_lower_extremity                 | 1.5988 +/- 0.04                           | 1.5895 +/- 0.06                                | 0.833   |
| upd2303e_rigidity_left_lower_extremity               | 1.4661 +/- 0.04                           | 1.6158 +/- 0.06                                | 0.075   |
| upd2304a_right_finger_tapping                        | 1.9912 +/- 0.04                           | 2.2789 +/- 0.07                                | 0.001   |
| upd2304b_left_finger_tapping                         | 1.9115 +/- 0.05                           | 2.2737 +/- 0.07                                | 0       |
| upd2305a_right_hand_movements                        | 1.7493 +/- 0.04                           | 1.9579 +/- 0.06                                | 0.011   |
| upd2305b_left_hand_movements                         | 1.7817 +/- 0.05                           | 2.0105 +/- 0.07                                | 0.005   |
| upd2306a_pron_sup_movement_right_hand                | 1.7198 +/- 0.04                           | 1.9474 +/- 0.06                                | 0.006   |
| upd2306b_pron_sup_movement_left_hand                 | 1.7375 +/- 0.05                           | 2.0053 +/- 0.07                                | 0.001   |
| upd2307a_right_toe_tapping                           | 1.7286 +/- 0.04                           | 2.0579 +/- 0.07                                | 0       |
| upd2307b_left_toe_tapping                            | 1.8112 +/- 0.05                           | 2.2421 +/- 0.07                                | 0       |
| upd2308a_right_leg_agility                           | 1.4395 +/- 0.03                           | 1.7316 +/- 0.06                                | 0       |
| upd2308b_left_leg_agility                            | 1.4956 +/- 0.04                           | 1.7632 +/- 0.06                                | 0       |
| upd2309_arising_from_chair                           | 1.1829 +/- 0.02                           | 1.2421 +/- 0.04                                | 0.302   |
| upd2310_gait                                         | 1.5516 +/- 0.03                           | 1.6947 +/- 0.05                                | 0.026   |
| upd2311_freezing_of_gait                             | 1.0177 +/- 0.01                           | 1.0316 +/- 0.02                                | 0.903   |
| upd2312_postural_stability                           | 1.1239 +/- 0.02                           | 1.2526 +/- 0.05                                | 0.205   |
| upd2313_posture                                      | 1.5988 +/- 0.04                           | 1.7 +/- 0.05                                   | 0.139   |
| upd2314_body_bradykinesia                            | 2.1799 +/- 0.04                           | 2.3211 +/- 0.06                                | 0.083   |
| upd2315a_postural_tremor_of_right_hand               | 1.4189 +/- 0.03                           | 1.4474 +/- 0.04                                | 0.494   |
| upd2315b_postural_tremor_of_left_hand                | 1.354 +/- 0.03                            | 1.3737 +/- 0.04                                | 0.481   |
| upd2316a_kinetic_tremor_of_right_hand                | 1.3776 +/- 0.03                           | 1.3789 +/- 0.04                                | 0.83    |
| upd2316b_kinetic_tremor_of_left_hand                 | 1.3923 +/- 0.03                           | 1.3789 +/- 0.04                                | 0.833   |
| upd2317a_rest_tremor_amplitude_right_upper_extremity | 1.6195 +/- 0.05                           | 1.6053 +/- 0.06                                | 0.911   |
| upd2317b_rest_tremor_amplitude_left_upper_extremity  | 1.4277 +/- 0.04                           | 1.4579 +/- 0.05                                | 0.646   |
| upd2317c_rest_tremor_amplitude_right_lower_extremity | 1.1386 +/- 0.02                           | 1.2053 +/- 0.04                                | 0.627   |
| upd2317d_rest_tremor_amplitude_left_lower_extremity  | 1.1062 +/- 0.02                           | 1.1895 +/- 0.04                                | 0.254   |
| upd2317e_rest_tremor_amplitude_lip_or_jaw            | 1.0531 +/- 0.01                           | 1.0895 +/- 0.02                                | 0.609   |
| upd2318_consistency_of_rest_tremor                   | 2.1593 +/- 0.06                           | 2.2579 +/- 0.09                                | 0.576   |
| upd2hy_hoehn_and_yahr_stage                          | 1.5546 +/- 0.03                           | 1.7632 +/- 0.04                                | 0       |
| upd2201_speech                                       | 1.4543 +/- 0.04                           | 1.5737 +/- 0.05                                | 0.048   |
| upd2202_saliva_and_drooling                          | 1.587 +/- 0.05                            | 1.7421 +/- 0.08                                | 0.066   |
| upd2203_chewing_and_swallowing                       | 1.177 +/- 0.03                            | 1.1947 +/- 0.04                                | 0.813   |
| upd2204_eating_tasks                                 | 1.3392 +/- 0.03                           | 1.3684 +/- 0.04                                | 0.651   |
| upd2205_dressing                                     | 1.4602 +/- 0.03                           | 1.5 +/- 0.05                                   | 0.431   |
| upd2206_hygiene                                      | 1.2448 +/- 0.02                           | 1.2368 +/- 0.03                                | 0.973   |
| upd2207_handwriting                                  | 1.8732 +/- 0.05                           | 1.9737 +/- 0.07                                | 0.424   |
| upd2208_doing_hobbies_and_other_activities           | 1.4513 +/- 0.04                           | 1.6053 +/- 0.06                                | 0.009   |
| upd2209_turning_in_bed                               | 1.3451 +/- 0.03                           | 1.3421 +/- 0.04                                | 0.892   |
| upd2210_tremor                                       | 2.0383 +/- 0.04                           | 2.0947 +/- 0.05                                | 0.439   |
| upd2211_get_out_of_bed_car_or_deep_chair             | 1.4779 +/- 0.03                           | 1.5421 +/- 0.05                                | 0.39    |
| upd2212_walking_and_balance                          | 1.4277 +/- 0.03                           | 1.5526 +/- 0.05                                | 0.046   |
| upd2213_freezing                                     | 1.0944 +/- 0.02                           | 1.1263 +/- 0.03                                | 0.763   |
| upd2101_cognitive_impairment                         | 1.3068 +/- 0.03                           | 1.3632 +/- 0.04                                | 0.239   |
| upd2102_hallucinations_and_psychosis                 | 1.056 +/- 0.01                            | 1.0474 +/- 0.02                                | 0.882   |
| upd2103_depressed_mood                               | 1.3186 +/- 0.03                           | 1.4421 +/- 0.06                                | 0.314   |
| upd2104_anxious_mood                                 | 1.4159 +/- 0.03                           | 1.6053 +/- 0.06                                | 0.027   |
| upd2105_apathy                                       | 1.2183 +/- 0.03                           | 1.2895 +/- 0.05                                | 0.438   |
| upd2106_dopamine_dysregulation_syndrome_features     | 1.0324 +/- 0.01                           | 1.0579 +/- 0.02                                | 0.843   |
| upd2107_pat_quest_sleep_problems                     | 1.9056 +/- 0.06                           | 2.1421 +/- 0.08                                | 0.026   |
| upd2108_pat_quest_daytime_sleepiness                 | 1.8171 +/- 0.05                           | 1.8263 +/- 0.06                                | 0.857   |
| upd2109_pat_quest_pain_and_other_sensations          | 1.767 +/- 0.05                            | 1.7895 +/- 0.07                                | 0.73    |
| upd2110_pat_quest_urinary_problems                   | 1.6431 +/- 0.05                           | 1.6737 +/- 0.06                                | 0.759   |
| upd2111_pat_quest_constipation_problems              | 1.4956 +/- 0.04                           | 1.5 +/- 0.06                                   | 0.985   |
| upd2112_pat_quest_lightheadedness_on_standing        | 1.3628 +/- 0.03                           | 1.4 +/- 0.05                                   | 0.576   |
| upd2113_pat_quest_fatigue                            | 1.7109 +/- 0.05                           | 1.8 +/- 0.06                                   | 0.226   |
| mds_updrs_part_i_sub_score                           | 1.3481 +/- 0.1                            | 1.8466 +/- 0.17                                | 0.009   |
| mds_updrs_part_i_pat_quest_sub_score                 | 4.7021 +/- 0.2                            | 5.1958 +/- 0.25                                | 0.021   |
| mds_updrs_part_i_summary_score                       | 4.16 +/- 0.26                             | 4.6384 +/- 0.36                                | 0.204   |
| mds_updrs_part_ii_summary_score                      | 3.5721 +/- 0.25                           | 4.2608 +/- 0.34                                | 0.043   |
| mds_updrs_part_iii_summary_score                     | 15.9481 +/- 0.53                          | 21.0221 +/- 0.73                               | 0       |
| mds_updrs_all                                        | 23.6803 +/- 0.8                           | 29.9175 +/- 1.07                               | 0       |

Supplemental Table 3

| Feature                                              | Average in Progressors +/- Standard Error | Average in None Progressors +/- Standard Error | P-values |
|------------------------------------------------------|-------------------------------------------|------------------------------------------------|----------|
| age_at_baseline                                      | 64.9118 +/- 0.72                          | 65.3833+/-0.64                                 | 0.745    |
| age_at_diagnosis                                     | 59.4071 +/- 1.15                          | 60.0283+/-1.01                                 | 0.034    |
| enrollment_months_after_baseline                     | -0.5579 +/- 0.03                          | -0.5398+/-0.03                                 | 0.958    |
| moca_visuospatial_executive_subscore                 | 4.1941 +/- 0.09                           | 4.2849+/-0.08                                  | 0.665    |
| moca_naming_subscore                                 | 2.8941 +/- 0.03                           | 2.8939+/-0.02                                  | 0.999    |
| moca_attention_digits_subscore                       | 1.8588 +/- 0.03                           | 1.8492+/-0.03                                  | 0.873    |
| moca11_attention_vigilance                           | 0.9471 +/- 0.02                           | 0.9553+/-0.02                                  | 0.824    |
| moca12_attention_serial_7s                           | 2.8118 +/- 0.04                           | 2.7697+/-0.04                                  | 0.613    |
| moca13_sentence_repetition                           | 1.6154 +/- 0.04                           | 1.6648+/-0.04                                  | 0.471    |
| moca15_verbal_fluency                                | 0.6647 +/- 0.04                           | 0.7458+/-0.03                                  | 0.119    |
| moca_language_subscore                               | 2.2706 +/- 0.06                           | 2.4022+/-0.06                                  | 0.134    |
| moca16_abstraction                                   | 1.8817 +/- 0.03                           | 1.8202+/-0.03                                  | 0.419    |
| moca_abstraction_subscore                            | 1.8817 +/- 0.03                           | 1.8202+/-0.03                                  | 0.419    |
| moca_delayed_recall_subscore                         | 3.2485 +/- 0.11                           | 3.1966+/-0.12                                  | 0.976    |
| moca_orientation_subscore                            | 5.8706 +/- 0.05                           | 5.8827+/-0.04                                  | 0.987    |
| moca_score                                           | 26.0529 +/- 0.24                          | 26.1341+/-0.25                                 | 0.628    |
| mod_schwab_england_pct_adl_score                     | 88.4706 +/- 0.93                          | 87.4157+/-1.02                                 | 0.568    |
| parkinsons_disease_PRS                               | 0.0026 +/- 0.0                            | 0.0025+/-0.0                                   | 0.534    |
| educational_attainment_PRS                           | 0.0005 +/- 0.0                            | 0.0004+/-0.0                                   | 0.091    |
| upd2301_speech_problems                              | 1.5706 +/- 0.06                           | 1.6556+/-0.06                                  | 0.301    |
| upd2302_facial_expression                            | 1.6941 +/- 0.06                           | 1.8222+/-0.06                                  | 0.088    |
| upd2303a_rigidity_neck                               | 1.7235 +/- 0.07                           | 2.1111+/-0.08                                  | 0.001    |
| upd2303b_rigidity_rt_upper_extremity                 | 2.0882 +/- 0.06                           | 2.3444+/-0.06                                  | 0.005    |
| upd2303c_rigidity_left_upper_extremity               | 2.0647 +/- 0.07                           | 2.2333+/-0.07                                  | 0.063    |
| upd2303d_rigidity_rt_lower_extremity                 | 1.6118 +/- 0.07                           | 1.85+/-0.07                                    | 0.011    |
| upd2303e_rigidity_left_lower_extremity               | 1.5647 +/- 0.07                           | 1.8+/-0.07                                     | 0.017    |
| upd2304a_right_finger_tapping                        | 2.0118 +/- 0.07                           | 2.2278+/-0.06                                  | 0.014    |
| upd2304b_left_finger_tapping                         | 2.1353 +/- 0.07                           | 2.4+/-0.07                                     | 0.007    |
| upd2305a_right_hand_movements                        | 1.8294 +/- 0.06                           | 1.9667+/-0.07                                  | 0.264    |
| upd2305b_left_hand_movements                         | 1.9471 +/- 0.07                           | 2.1944+/-0.07                                  | 0.023    |
| upd2306a_pron_sup_movement_right_hand                | 1.8059 +/- 0.07                           | 1.9778+/-0.07                                  | 0.068    |
| upd2306b_pron_sup_movement_left_hand                 | 2.0176 +/- 0.08                           | 2.2278+/-0.07                                  | 0.019    |
| upd2307a_right_toe_tapping                           | 1.7824 +/- 0.07                           | 2.0333+/-0.07                                  | 0.01     |
| upd2307b_left_toe_tapping                            | 1.9647 +/- 0.07                           | 2.2778+/-0.08                                  | 0.008    |
| upd2308a_right_leg_agility                           | 1.3941 +/- 0.05                           | 1.5889+/-0.06                                  | 0.081    |
| upd2308b_left_leg_agility                            | 1.5118 +/- 0.06                           | 1.6667+/-0.07                                  | 0.252    |
| upd2309_arising_from_chair                           | 1.2118 +/- 0.04                           | 1.2667+/-0.05                                  | 0.752    |
| upd2310_gait                                         | 1.6941 +/- 0.05                           | 1.8389+/-0.05                                  | 0.09     |
| upd2311_freezing_of_gait                             | 1.0824 +/- 0.03                           | 1.1833+/-0.04                                  | 0.343    |
| upd2312_postural_stability                           | 1.4471 +/- 0.07                           | 1.4944+/-0.07                                  | 0.743    |
| upd2313_posture                                      | 1.6588 +/- 0.07                           | 1.8056+/-0.07                                  | 0.187    |
| upd2314_body_bradykinesia                            | 1.8059 +/- 0.05                           | 1.9444+/-0.06                                  | 0.282    |
| upd2315a_postural_tremor_of_right_hand               | 1.4 +/- 0.05                              | 1.5333+/-0.05                                  | 0.114    |
| upd2315b_postural_tremor_of_left_hand                | 1.4412 +/- 0.05                           | 1.5444+/-0.05                                  | 0.181    |
| upd2316a_kinetic_tremor_of_right_hand                | 1.6059 +/- 0.05                           | 1.6833+/-0.05                                  | 0.4      |
| upd2316b_kinetic_tremor_of_left_hand                 | 1.7059 +/- 0.05                           | 1.7944+/-0.05                                  | 0.328    |
| upd2317a_rest_tremor_amplitude_right_upper_extremity | 1.3353 +/- 0.05                           | 1.4944+/-0.06                                  | 0.2      |
| upd2317b_rest_tremor_amplitude_left_upper_extremity  | 1.3529 +/- 0.06                           | 1.45+/-0.06                                    | 0.213    |
| upd2317c_rest_tremor_amplitude_right_lower_extremity | 1.0647 +/- 0.02                           | 1.1167+/-0.03                                  | 0.449    |
| upd2317d_rest_tremor_amplitude_left_lower_extremity  | 1.0765 +/- 0.03                           | 1.1278+/-0.03                                  | 0.561    |
| upd2317e_rest_tremor_amplitude_lip_or_jaw            | 1.0294 +/- 0.01                           | 1.0722+/-0.02                                  | 0.667    |
| upd2318_consistency_of_rest_tremor                   | 1.8824 +/- 0.1                            | 2.2722+/-0.11                                  | 0.005    |
| upd2hy_hoehn_and_yahr_stage                          | 2.0353 +/- 0.04                           | 2.1167+/-0.05                                  | 0.415    |
| upd2201_speech                                       | 1.7059 +/- 0.07                           | 1.7556+/-0.07                                  | 0.806    |
| upd2202_saliva_and_drooling                          | 1.9882 +/- 0.09                           | 2.0111+/-0.09                                  | 0.963    |
| upd2203_chewing_and_swallowing                       | 1.2235 +/- 0.04                           | 1.3111+/-0.04                                  | 0.096    |
| upd2204_eating_tasks                                 | 1.3824 +/- 0.05                           | 1.5722+/-0.06                                  | 0.049    |
| upd2205_dressing                                     | 1.6353 +/- 0.06                           | 1.7722+/-0.06                                  | 0.169    |
| upd2206_hygiene                                      | 1.2706 +/- 0.04                           | 1.4+/-0.05                                     | 0.062    |
| upd2207_handwriting                                  | 2.0824 +/- 0.09                           | 2.2222+/-0.09                                  | 0.249    |
| upd2208_doing_hobbies_and_other_activities           | 1.7235 +/- 0.08                           | 1.7889+/-0.08                                  | 0.599    |
| upd2209_turning_in_bed                               | 1.4824 +/- 0.05                           | 1.6667+/-0.07                                  | 0.143    |
| upd2210_tremor                                       | 2.0118 +/- 0.06                           | 2.2278+/-0.06                                  | 0.03     |
| upd2211_get_out_of_bed_car_or_deep_chair             | 1.7412 +/- 0.06                           | 1.8222+/-0.06                                  | 0.379    |
| upd2212_walking_and_balance                          | 1.8588 +/- 0.08                           | 1.7056+/-0.07                                  | 0.163    |
| upd2213_freezing                                     | 1.3882 +/- 0.07                           | 1.35+/-0.06                                    | 0.936    |
| upd2101_cognitive_impairment                         | 1.4824 +/- 0.06                           | 1.5278+/-0.07                                  | 0.859    |
| upd2102_hallucinations_and_psychosis                 | 1.1529 +/- 0.04                           | 1.1222+/-0.03                                  | 0.951    |
| upd2103_depressed_mood                               | 1.2882 +/- 0.05                           | 1.25+/-0.05                                    | 0.474    |
| upd2104_anxious_mood                                 | 1.4412 +/- 0.06                           | 1.4944+/-0.06                                  | 0.379    |
| upd2105_apathy                                       | 1.2235 +/- 0.04                           | 1.2278+/-0.04                                  | 0.864    |
| upd2106_dopamine_dysregulation_syndrome_features     | 1.1294 +/- 0.03                           | 1.1333+/-0.03                                  | 0.929    |
| mds_updrs_part_i_sub_score                           | 1.7176 +/- 0.18                           | 1.7556+/-0.17                                  | 0.854    |
| upd2107_pat_quest_sleep_problems                     | 2.2706 +/- 0.09                           | 2.2944+/-0.09                                  | 0.826    |
| upd2108_pat_quest_daytime_sleepiness                 | 2.1 +/- 0.07                              | 2.2389+/-0.07                                  | 0.241    |
| upd2109_pat_quest_pain_and_other_sensations          | 1.9824 +/- 0.08                           | 2.0222+/-0.08                                  | 0.641    |
| upd2110_pat_quest_urinary_problems                   | 1.8118 +/- 0.08                           | 1.9667+/-0.08                                  | 0.229    |
| upd2111_pat_quest_constipation_problems              | 1.6706 +/- 0.07                           | 1.8222+/-0.07                                  | 0.038    |
| upd2112_pat_quest_lighththeadedness_on_standing      | 1.4471 +/- 0.06                           | 1.55+/-0.07                                    | 0.452    |
| upd2113_pat_quest_fatigue                            | 1.8882 +/- 0.06                           | 2.0278+/-0.08                                  | 0.459    |
| mds_updrs_part_i_pat_quest_sub_score                 | 6.1706 +/- 0.32                           | 6.9222+/-0.32                                  | 0.11     |
| mds_updrs_part_i_summary_score                       | 4.1824 +/- 0.39                           | 4.6854+/-0.43                                  | 0.566    |
| mds_updrs_part_ii_summary_score                      | 4.7581 +/- 0.5                            | 5.6231+/-0.56                                  | 0.355    |
| mds_updrs_part_iii_summary_score                     | 19.1496 +/- 0.94                          | 24.4997+/-1.05                                 | 0        |
| mds_updrs_all                                        | 28.0902 +/- 1.51                          | 34.8082+/-1.71                                 | 0.002    |

**Supplemental Table 4****Full Meta-prediction**

|                 | PPMI            |             | PDPB            |             |
|-----------------|-----------------|-------------|-----------------|-------------|
|                 | Non-Progressors | Progressors | Non-Progressors | Progressors |
| Non-Progressors | 25              | 22          | 130             | 52          |
| Progressors     | 18              | 67          | 37              | 131         |

**No Genetics**

|                 | PPMI            |             | PDPB            |             |
|-----------------|-----------------|-------------|-----------------|-------------|
|                 | Non-Progressors | Progressors | Non-Progressors | Progressors |
| Non-Progressors | 18              | 29          | 120             | 62          |
| Progressors     | 28              | 57          | 50              | 118         |

**No Physician Exam**

|                 | PPMI            |             | PDPB            |             |
|-----------------|-----------------|-------------|-----------------|-------------|
|                 | Non-Progressors | Progressors | Non-Progressors | Progressors |
| Non-Progressors | 21              | 26          | 126             | 56          |
| Progressors     | 25              | 60          | 46              | 122         |

**No Surveys**

|                 | PPMI            |             | PDPB            |             |
|-----------------|-----------------|-------------|-----------------|-------------|
|                 | Non-Progressors | Progressors | Non-Progressors | Progressors |
| Non-Progressors | 23              | 24          | 125             | 57          |
| Progressors     | 23              | 62          | 39              | 129         |

**Supplemental Table 5**

|                             |             |             | <b>PPMI</b>               |                     |          |
|-----------------------------|-------------|-------------|---------------------------|---------------------|----------|
|                             | Sensitivity | Specificity | Positive Predictive Value | Negative Predictive | F1-score |
| <b>Full Meta-prediction</b> | 0.79        | 0.53        | 0.75                      | 0.58                | 0.77     |
| <b>No Genetics</b>          | 0.67        | 0.38        | 0.66                      | 0.39                | 0.67     |
| <b>No Physician Exam</b>    | 0.71        | 0.45        | 0.7                       | 0.46                | 0.7      |
| <b>No Surveys</b>           | 0.73        | 0.49        | 0.72                      | 0.5                 | 0.73     |

|                             |             |             | <b>PDBP</b>               |                     |          |
|-----------------------------|-------------|-------------|---------------------------|---------------------|----------|
|                             | Sensitivity | Specificity | Positive Predictive Value | Negative Predictive | F1-score |
| <b>Full Meta-prediction</b> | 0.78        | 0.71        | 0.72                      | 0.78                | 0.75     |
| <b>No Genetics</b>          | 0.7         | 0.66        | 0.66                      | 0.71                | 0.68     |
| <b>No Physician Exam</b>    | 0.73        | 0.69        | 0.69                      | 0.73                | 0.71     |
| <b>No Surveys</b>           | 0.77        | 0.69        | 0.69                      | 0.76                | 0.73     |
